# Supplementary material for: Enhanced Visible-Light-Responsive Photocatalytic Degradation of Ciprofloxacin by the CuxO/Metal-Organic Framework Hybrid Nanocomposite
Source: MDPI journal article supplement (doi:10.3390/nano13020282), 2023-01-09
Supplement: s1 [file s1]

Supplementary information

# Enhanced Visible-Light-Responsive Photocatalytic Degradation of Ciprofloxacin by the $\text{Cu}_x\text{O}$ /Metal-Organic Framework Hybrid Nanocomposite

Cheng-Kuo Tsai <sup>1,2,\*</sup>, Ching-Hsuan Huang <sup>3</sup>, Jao-Jia Horng <sup>1,2</sup>, Hui Lin Ong <sup>4,5,\*</sup> and Ruey-An Doong <sup>6</sup>

<sup>1</sup> Department of Safety Health and Environmental Engineering, National Yunlin University of Science and Technology, Douliou 64002, Taiwan

<sup>2</sup> Emergency Response Information Center, National Yunlin University of Science and Technology, Douliou 64002, Taiwan

<sup>3</sup> Institute of Environmental Engineering, National Yang Ming Chiao Tung University, Hsinchu 30010, Taiwan

<sup>4</sup> Faculty of Chemical Engineering Technology, Universiti Malaysia Perlis, Arau 02600, Malaysia

<sup>5</sup> Centre of Excellence for Biomass Utilization and Taiwan-Malaysia Innovation Centre for Clean Water and Sustainable Energy (WISE Centre), Universiti Malaysia Perlis (UniMAP), Jejawi 02600, Malaysia

<sup>6</sup> Institute of Analytical and Environmental Sciences, National Tsing Hua University, Hsinchu 30013, Taiwan

\* Correspondence: cktsai@yuntech.edu.tw (C.-K.T.); hlong@unimap.edu.my (H.L.O.)

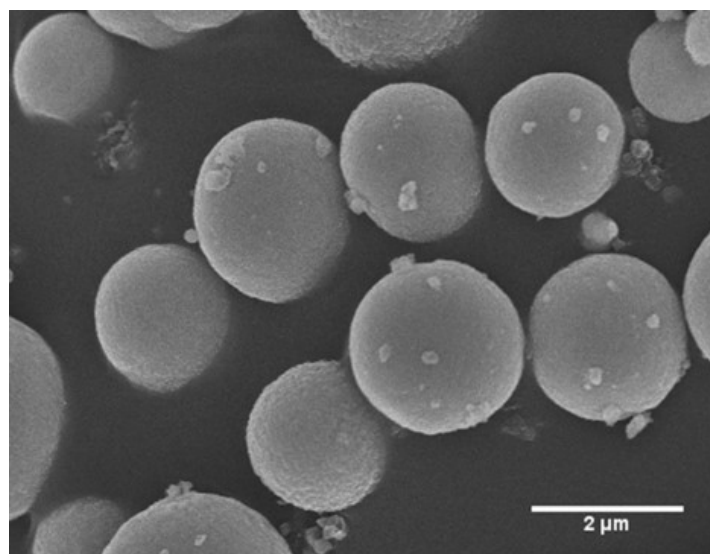

**Figure S1.** SEM image of Cu-MOF-urea.

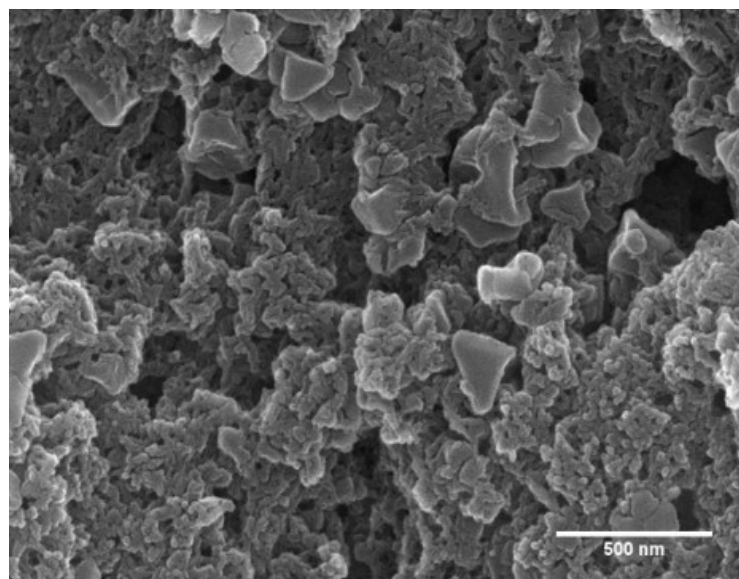

**Figure S2.** SEM image of Cu<sub>x</sub>O/MOF.

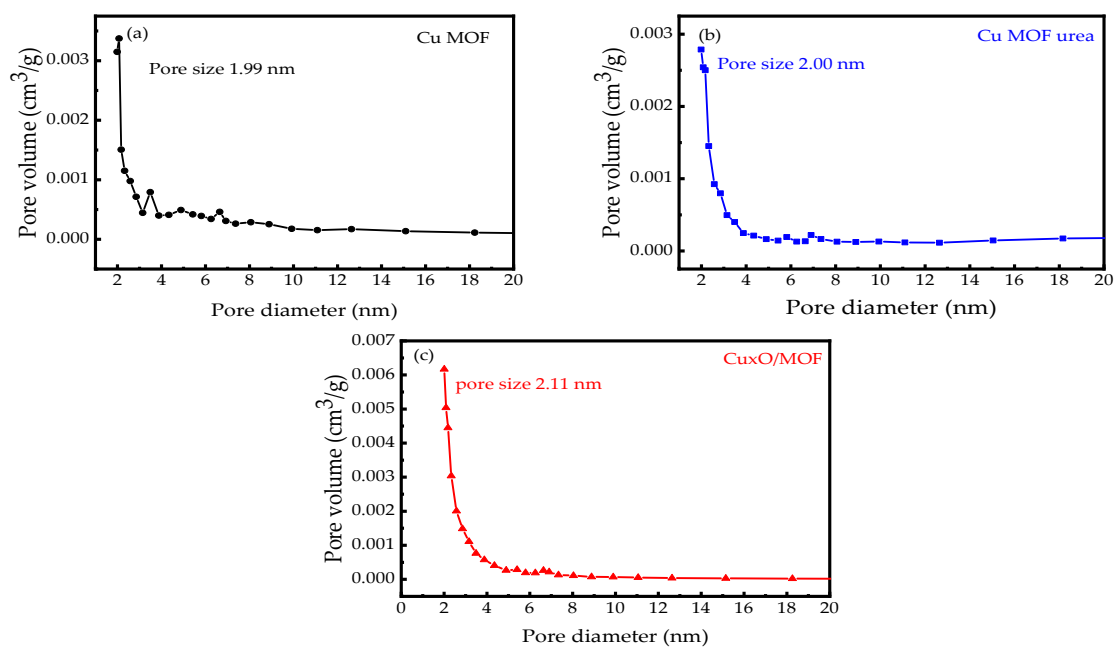

**Figure S3.** BJH isotherm curves of pore size of Cu-MOF(a), Cu-MOF-urea(b), and Cu<sub>x</sub>O/MOF(c) after carbonization at 300 °C in the presence of Ar/H<sub>2</sub>.

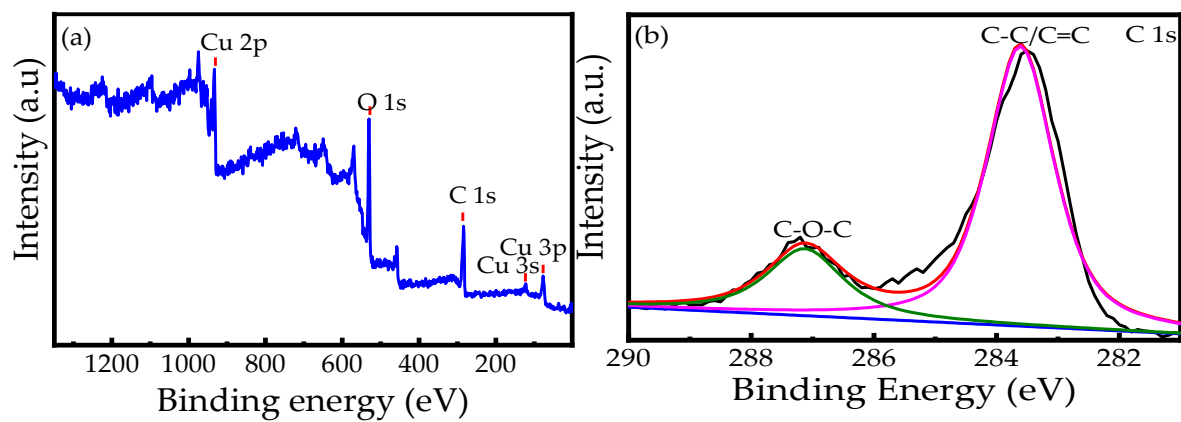

Figure S4. XPS analysis of the Cu<sub>x</sub>O/MOF (a) full scan, (b) C 1s peaks.

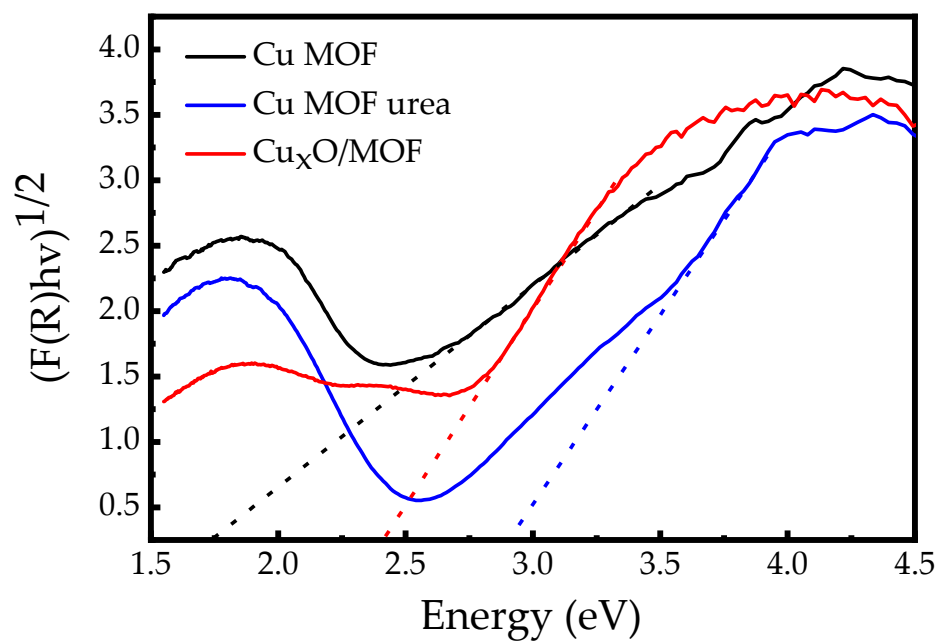

Figure S5. The Kubelka-Munk plots of the as-prepared materials.

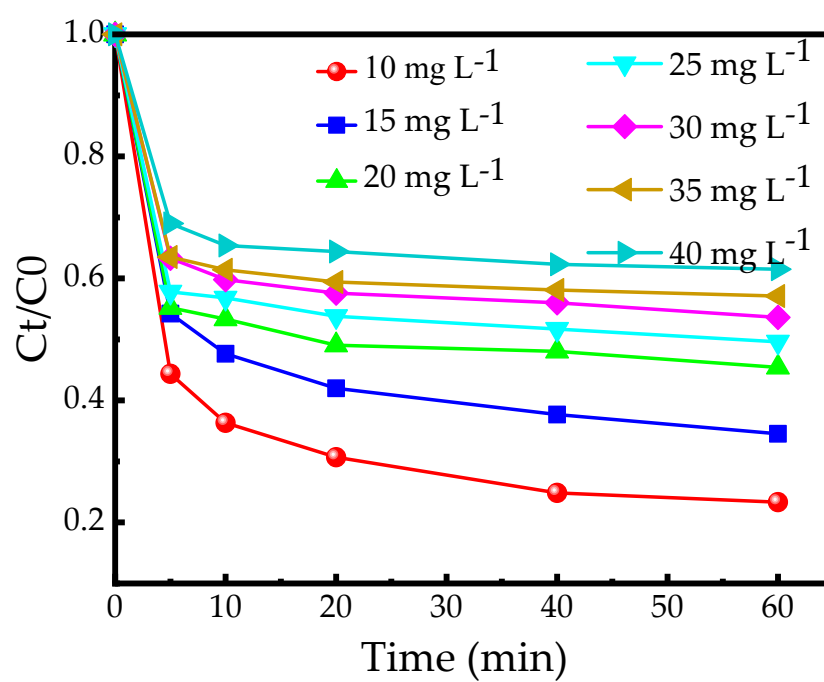

**Figure S6.** Adsorption of CIP in the range of concentration from 10 to 40 mg L<sup>-1</sup> in the presence of 0.5 g L<sup>-1</sup> Cu<sub>x</sub>O/MOF in the dark.

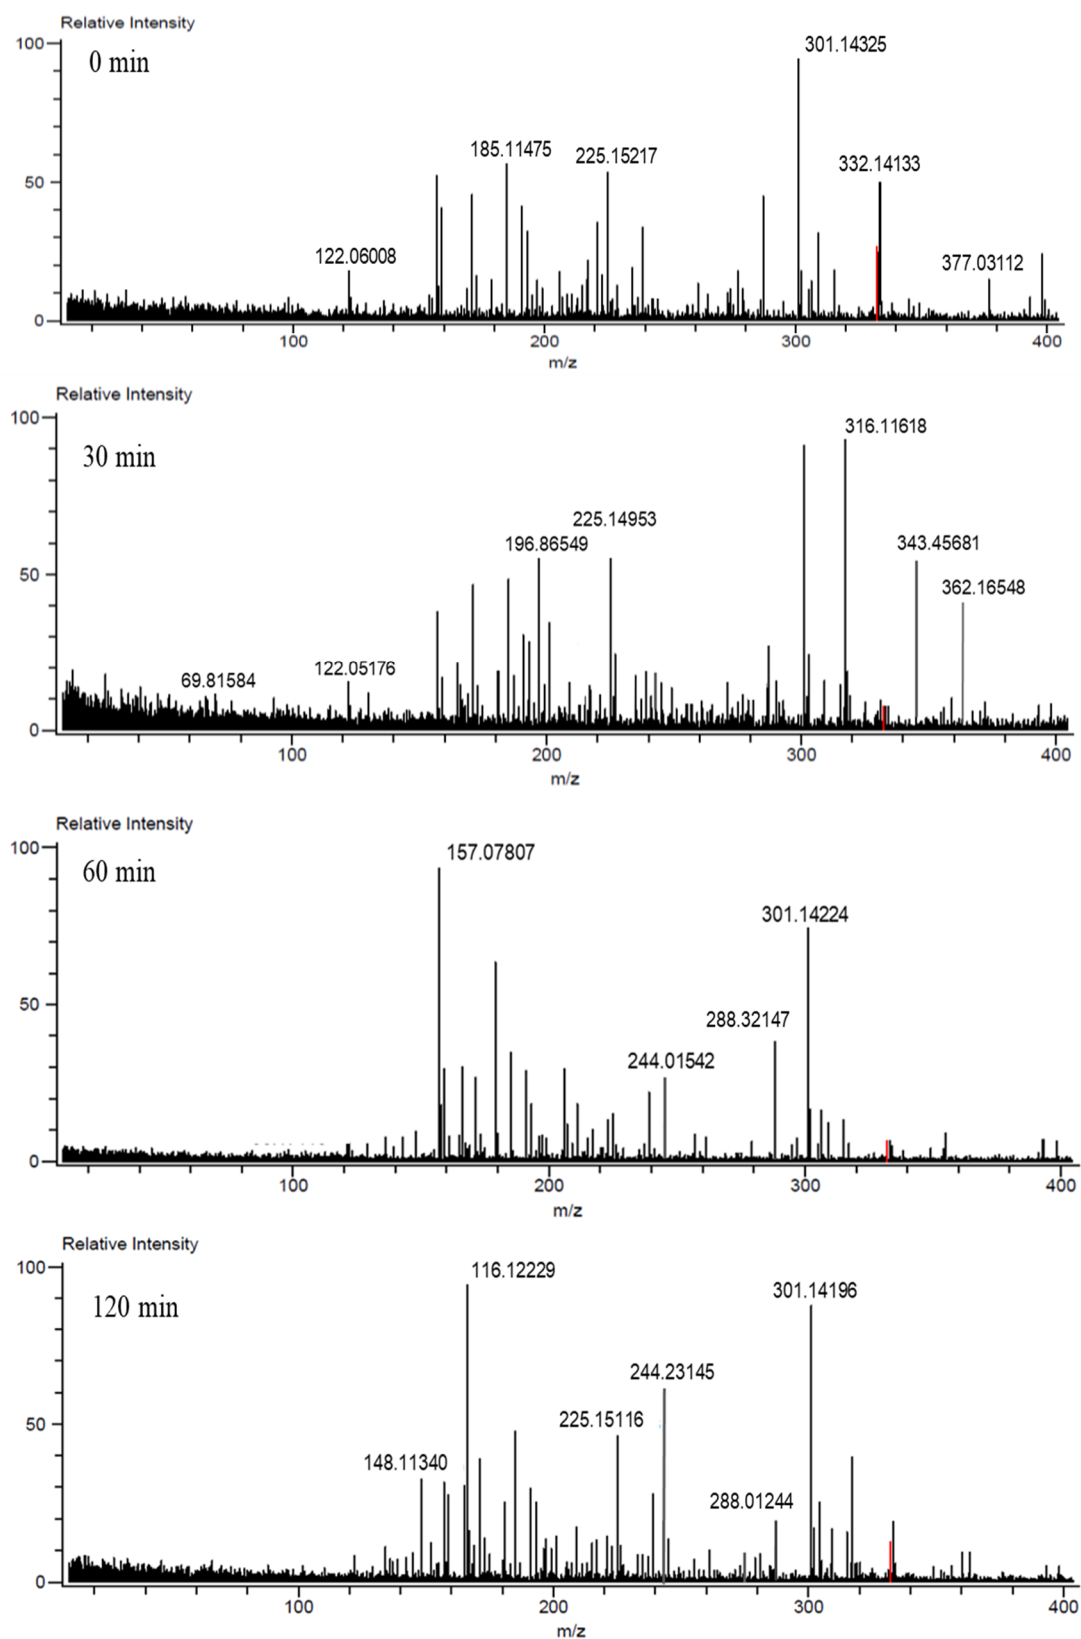

**Figure S7.** The MS spectra of intermediates produced from the CIP photodegradation by Cu<sub>2</sub>O/MOF at different incubation period.

**Table S1.** Isotherm model constant and non-linear regression parameters for fit of CIP adsorption.

| Isotherm models  | Parameters               | CIP    |
|------------------|--------------------------|--------|
| Langmuir         | Qm (mg g <sup>-1</sup> ) | 33.411 |
|                  | K <sub>L</sub>           | 0.3163 |
|                  | R <sup>2</sup>           | 0.9487 |
| Freundlich       | K <sub>f</sub>           | 2.90   |
|                  | N                        | 3.15   |
|                  | R <sup>2</sup>           | 0.9691 |
| Sips             | Qm (mg g <sup>-1</sup> ) | 39.653 |
|                  | K <sub>s</sub>           | 0.045  |
|                  | m                        | 0.4262 |
|                  | R <sup>2</sup>           | 0.9893 |
| Toth             | Qm (mg g <sup>-1</sup> ) | 12.32  |
|                  | K <sub>T</sub>           | 2.765  |
|                  | t                        | 0.7799 |
|                  | R <sup>2</sup>           | 0.9791 |
| Redlich-Peterson | K <sub>R</sub>           | 34.03  |
|                  | a                        | 2.207  |
|                  | b                        | 0.779  |
|                  | R <sup>2</sup>           | 0.9791 |

**Table S2.** CIP degradation pathway of Intermediates information.

| Product name   | Molecular weight | Chemical formula and name                                                                                              |
|----------------|------------------|------------------------------------------------------------------------------------------------------------------------|
| CIP            | 332              | 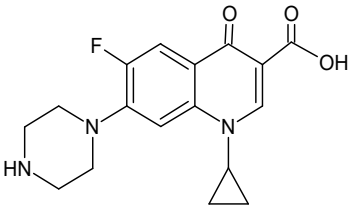 <p>Chemical structure of CIP</p> |
| I <sub>1</sub> | 362              |                                   |

1-cyclopropyl-6-fluoro-7-{formyl[2-(formylamino)ethyl]amino}-4-oxo-1,4-dihydroquinoline-3-carboxylic acid

I<sub>2</sub>

343

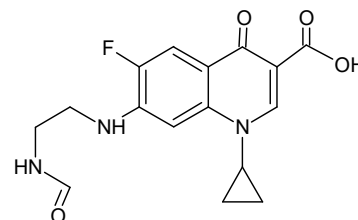

1-cyclopropyl-6-fluoro-7-{[2-(formylamino)ethyl]amino}-4-oxo-1,4-dihydroquinoline-3-carboxylic acid

Table S2, Continued

| Product name   | Molecular weight | Chemical formula                                                                                                                                                                       |
|----------------|------------------|----------------------------------------------------------------------------------------------------------------------------------------------------------------------------------------|
| I <sub>3</sub> | 316              | 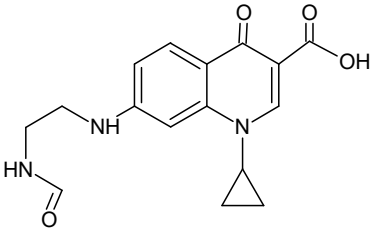 <p>1-cyclopropyl-7-{[2-(formylamino)ethyl]amino}-4-oxo-1,4-dihydroquinoline-3-carboxylic acid</p> |
| I <sub>4</sub> | 288              |  <p>7-[(2-aminoethyl)amino]-1-cyclopropyl-4-oxo-1,4-dihydroquinoline-3-carboxylic acid</p>        |
| I <sub>5</sub> | 244              |  <p>1-cyclopropyl 4-oxo 7-amino 1,4-dihydroquinoline 3-carboxylic acid</p>                        |
